# Supplementary material for: The catalytic subunit of DNA polymerase δ inhibits γTuRC activity and regulates Golgi-derived microtubules
Source: PubMed Central journal article supplement (PMC5601897; doi:10.1038/s41467-017-00694-2), 2017-09-15
Supplement: 41467_2017_694_MOESM1_ESM.pdf [file 41467_2017_694_MOESM1_ESM.pdf]

## Description of Supplementary Files

### **Title: Supplementary Information**

Description: Supplementary Figures and Supplementary Tables

### **Title: Peer Review File**

### **Title: Supplementary Movie 1**

Description: Golgi reorientation in control cells. Venus- $\beta$ -1,4-galactosyltransferase (GalTase; green) was transiently expressed in RPE1 cells transfected with a control siRNA. For the recording, cells expressing the Golgi marker were selected from the first row of cells facing the wound edge. The play-back rate is 5 frames/s. Time is shown in the h:min format. Scale bar, 10  $\mu$ m.

### **Title: Supplementary Movie 2**

Description: Golgi reorientation in PoID1-depleted cells. Venus-GalTase (green) was transiently expressed in RPE1 cells transfected with a PoID1 siRNA. For the recording, cells expressing the green Golgi marker were selected from the first row of cells facing the wound edge. The play-back rate is 5 frames/s. Time is shown in the h:min format. Scale bar, 10  $\mu$ m.

### **Title: Supplementary Movie 3**

Description: Directional migration of control cells. A wound-healing assay was performed using RPE1 cells transfected with a control siRNA. After wounding, the cells were recorded once every 5 min for 20 h. The play-back rate is 15 frames/s. Time is shown in the h:min format. Scale bar, 20  $\mu$ m.

### **Title: Supplementary Movie 4**

Description: Directional migration of PoID1-depleted cells. A woundhealing assay was performed using RPE1 cells transfected with a PoID1 siRNA. After wounding, the cells were recorded once every 5 min for 20 h. The play-back rate is 15 frames/s. Time is shown in the h:min format. Scale bar, 20  $\mu$ m.

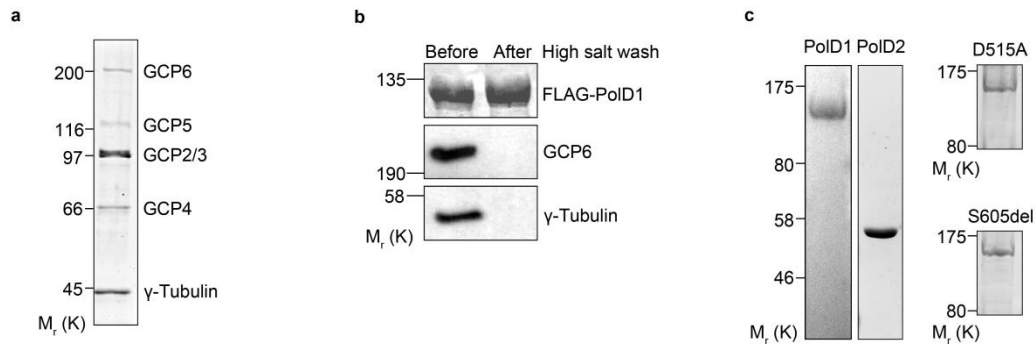

**Supplementary Figure 1** Characterization of purified  $\gamma$ TuRCs and FLAG-PolD1 proteins. **(a)** The SDS-PAGE gel image of purified  $\gamma$ TuRCs was acquired on an imager (Typhoon Trio, GE Healthcare). The gel was stained with SYPRO Ruby. **(b)** FLAG-PolD1 was expressed in HEK293T cells and immunoprecipitated through the FLAG tag. Beads bound with the PolD1 protein were immunoblotted for  $\gamma$ -tubulin and GCP6 before and after washing under a stringent condition (1 M NaCl and 0.1% IGEPAL CA-630). After washing, the  $\gamma$ -tubulin complex proteins were not detectable on the beads. **(c)** FLAG-PolD1, its D515V and S605del mutants, and PolD2 were expressed and isolated as in **(b)**. The PolD1 and PolD2 proteins were retrieved from the beads and then analyzed using SDS-PAGE and Coomassie Blue staining.

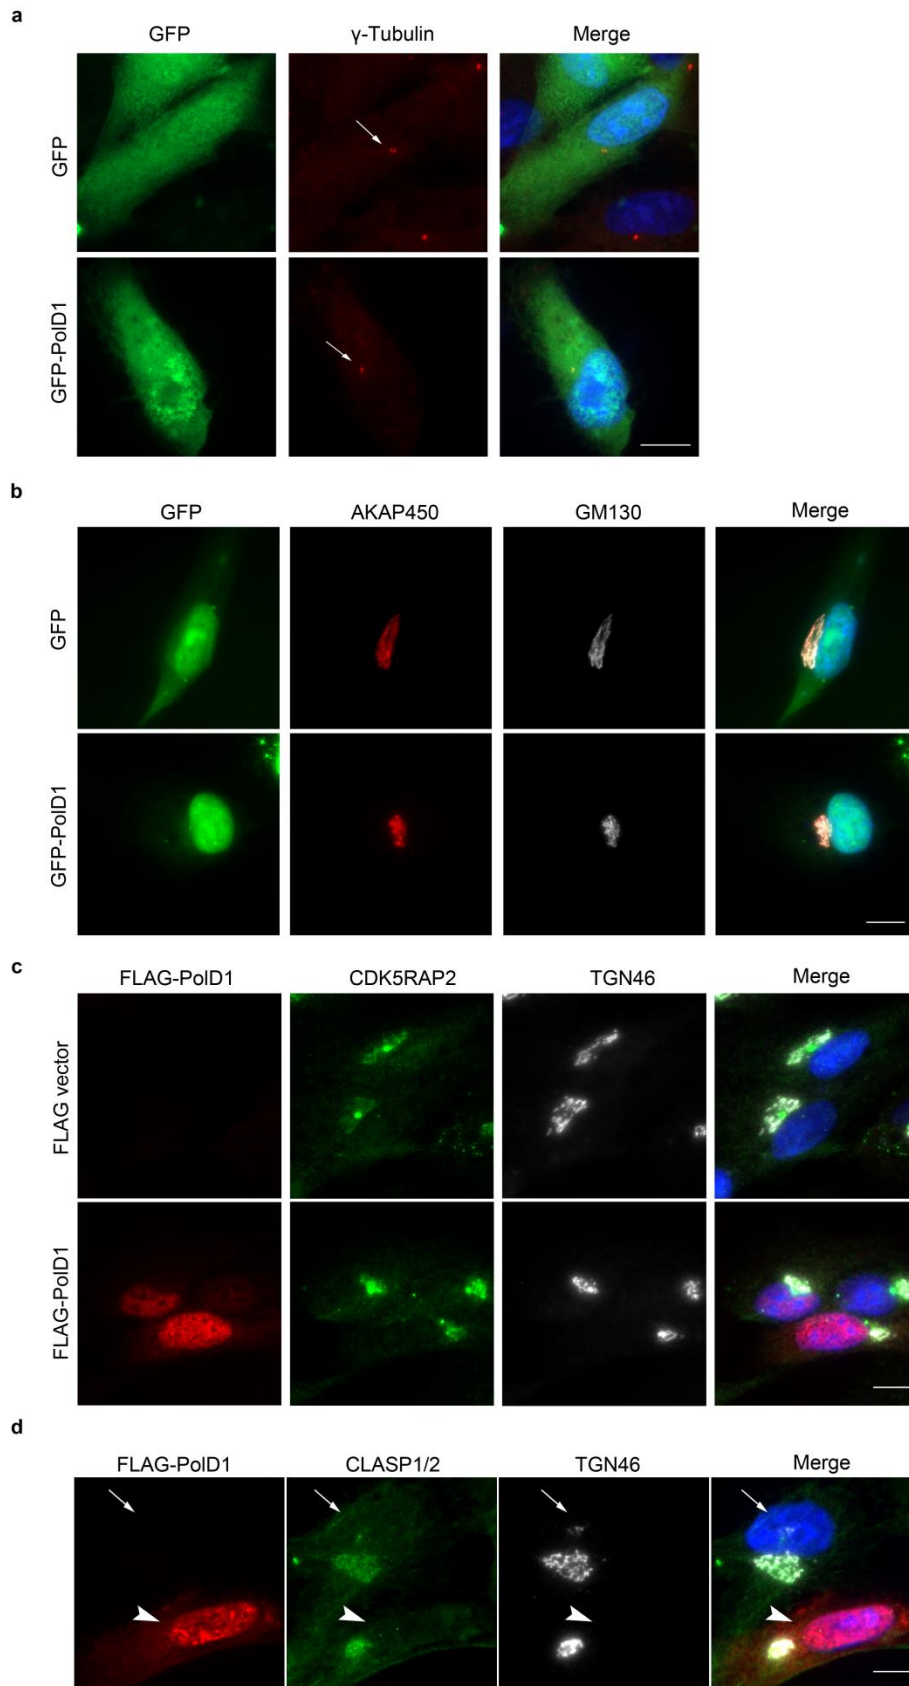

**Supplementary Figure 2** PolD1 overexpression does not affect the centrosomal level of  $\gamma$ -tubulin and the Golgi localization of AKAP450, CDK5RAP2, and CLASPs. RPE1 cells were transfected with PolD1-expressing constructs or their vectors, as indicated. The cells were immunostained for  $\gamma$ -tubulin (**a**), AKAP450 and GM130 (**b**), CDK5RAP2 and TGN46 (**c**), CLASP1/2 and TGN46 (**d**), as indicated. The nuclear DNA was stained with Hoechst 33258. (**a**) Arrows indicate  $\gamma$ -tubulin in transfected cells. (**d**) Arrows indicate a non-transfected cell, and arrowheads indicate a PolD1-transfected cell. The images shown are representative of at least 3 experiments. Scale bars, 10  $\mu$ m.

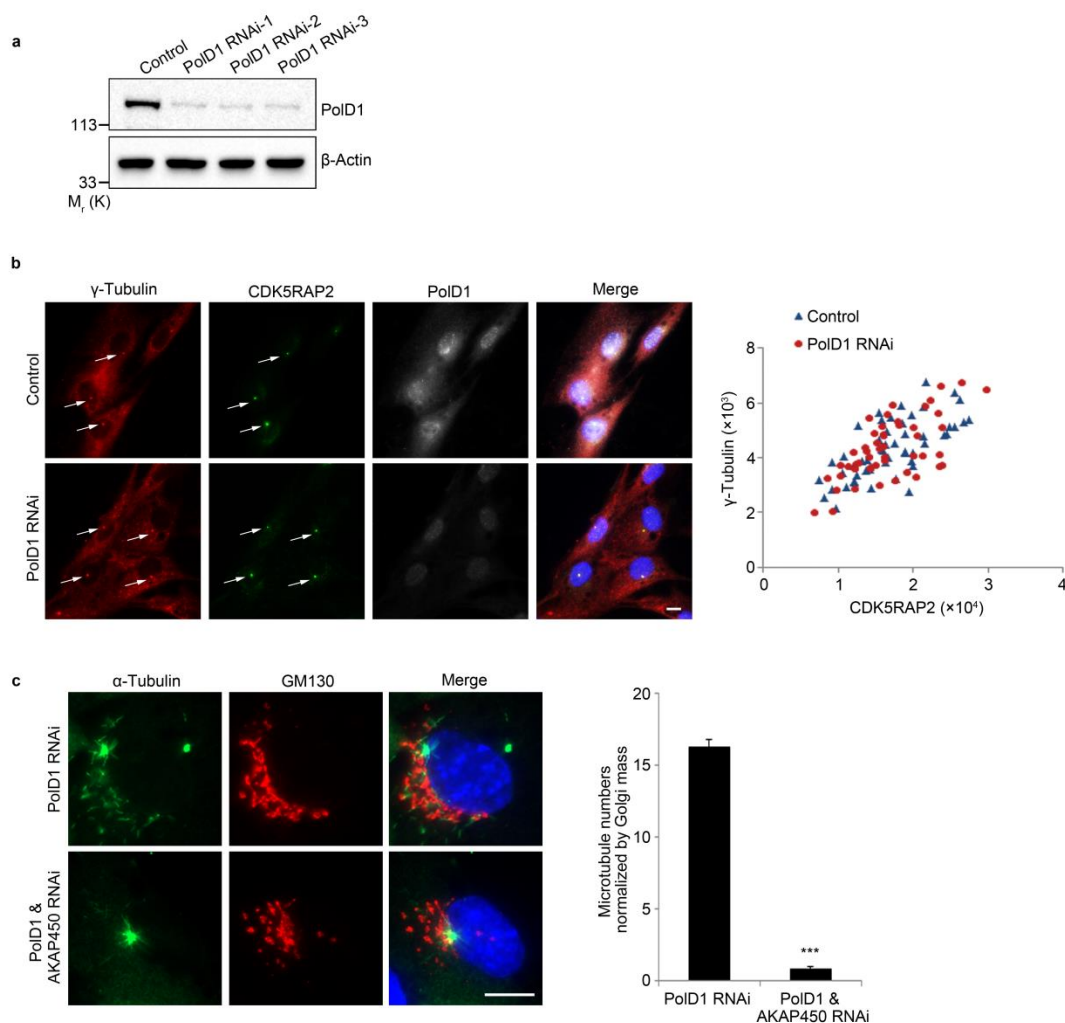

**Supplementary Figure 3** Suppression of PolD1 expression through transfection of *pold1*-targeting siRNAs. **(a)** RPE1 cells were transfected with either *pold1*-targeting siRNA (PolD1 RNAi-1, PolD1 RNAi-2, or PolD1 RNAi-3) or control siRNA (Control), and 24 h later, the cells were analyzed by means of immunoblotting. Transfection of cells with each of the PolD1 siRNAs suppressed PolD1 expression by ~90%. **(b)** The centrosomal localization of  $\gamma$ -tubulin does not require PolD1. RPE1 cells were transfected with PolD1 siRNA (PolD1 RNAi) or control siRNA. The cells were fixed and immunostained for  $\gamma$ -tubulin and the centrosomal scaffold protein CDK5RAP2. Arrows indicate centrosomal  $\gamma$ -tubulin and CDK5RAP2. Hoechst 33258 was used to stain DNA. The images shown are representative of at least 3 experiments. The fluorescence intensities of  $\gamma$ -tubulin and CDK5RAP2 were measured within a circle (2  $\mu$ m diameter)

centered at the centrosomes. The cytoplasmic fluorescence obtained using a circle of the same size was taken as the background and subtracted from the centrosomal fluorescence.

(c) Suppression of AKAP450 expression inhibits PolD1-depletion-induced nucleation of Golgi-associated microtubules. After microtubule depolymerization at 0°C, cells were shifted to 37°C to allow microtubule regrowth for 1 min. Hoechst 33258 was used to stain DNA. After regrowth, Golgi-associated microtubules were counted and normalized by the Golgi mass. The images shown are representative of at least 3 experiments. Scale bars, 10 μm. The data are presented as means ± s.d. and are representative of 3 independent experiments; \*\*\* $p < 0.001$ , two-tailed, unpaired student's  $t$ -test.

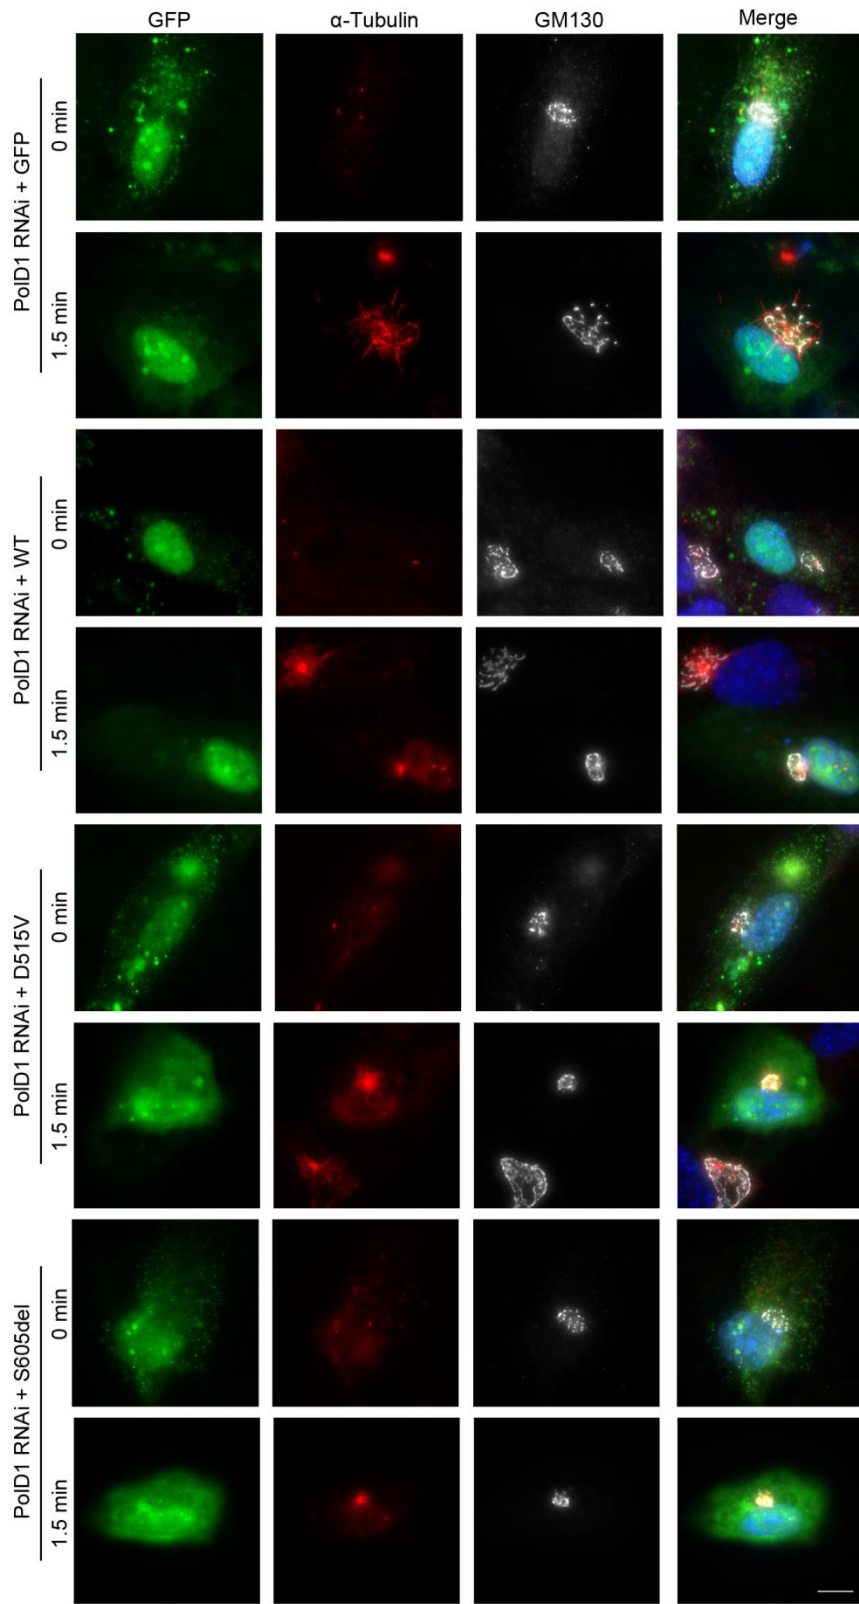

**Supplementary Figure 4** Microtubule regrowth induced by PolD1 depletion is inhibited by the expression of PolD1 or its D515V and S605del mutants. GFP-PolD1 (WT), the PolD1 mutants (D515V and S605del), and GFP were separately expressed in RPE1 cells that were transfected with the siRNA targeting an untranslated region of *pold1* (PolD1 RNAi-3). Microtubule regrowth was performed and then the cells were stained for microtubules ( $\alpha$ -tubulin) and GM130. The images shown are representative of at least 3 experiments. Scale bar, 10  $\mu$ m.



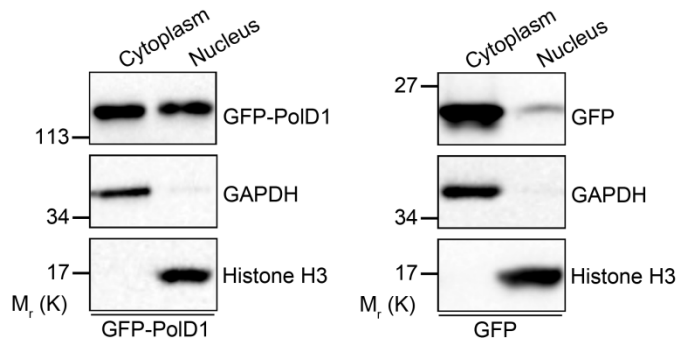

**Supplementary Figure 5** Subcellular distribution of GFP-PolD1 and GFP. RPE1 cells transfected with GFP-PolD1 or GFP were lysed and the lysates were fractionated into cytoplasmic (Cytoplasm) and nuclear (Nucleus) fractions. An equal proportion of each fraction was immunoblotted with anti-GFP, anti-GAPDH, and anti-Histone H3.

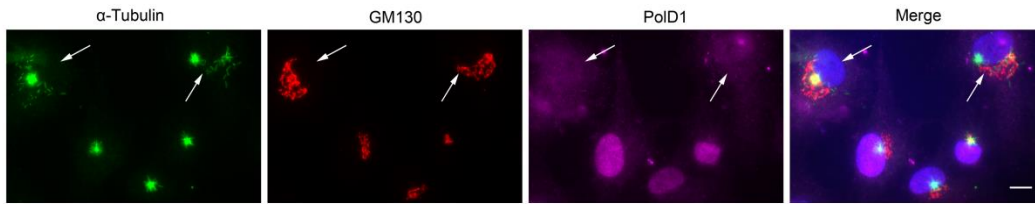

**Supplementary Figure 6** Golgi size and Golgi-associated microtubule nucleation are inversely correlated with the PolD1 level in RPE1 cells. After microtubule depolymerization at 0°C, cells were shifted to 37°C to allow microtubule regrowth for 1 min, after which the cells were immunostained for microtubules (anti- $\alpha$ -tubulin), GM130, and PolD1. Hoechst 33258 was used to stain DNA. Arrows indicate cells containing low levels of PolD1. The images shown are representative of at least 3 experiments. Scale bar, 10  $\mu$ m.

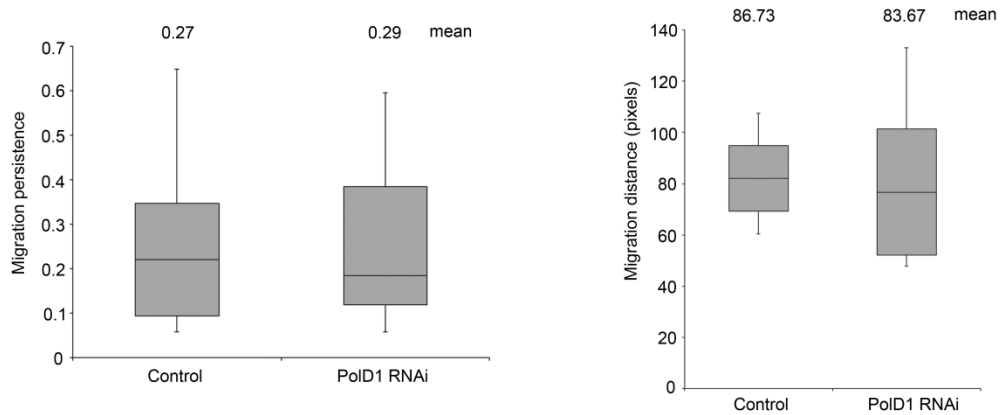

**Supplementary Figure 7** PoD1 knockdown does not affect random migration of cells. The persistence and the distance of random migration of control and PoD1 siRNA-transfected cells were measured and are shown here as box-and-whisker plots (n = 50 cells per condition). Boxes represent the 25th and 75th percentiles and whiskers represent the 10th and 90th percentiles of persistence or distance.

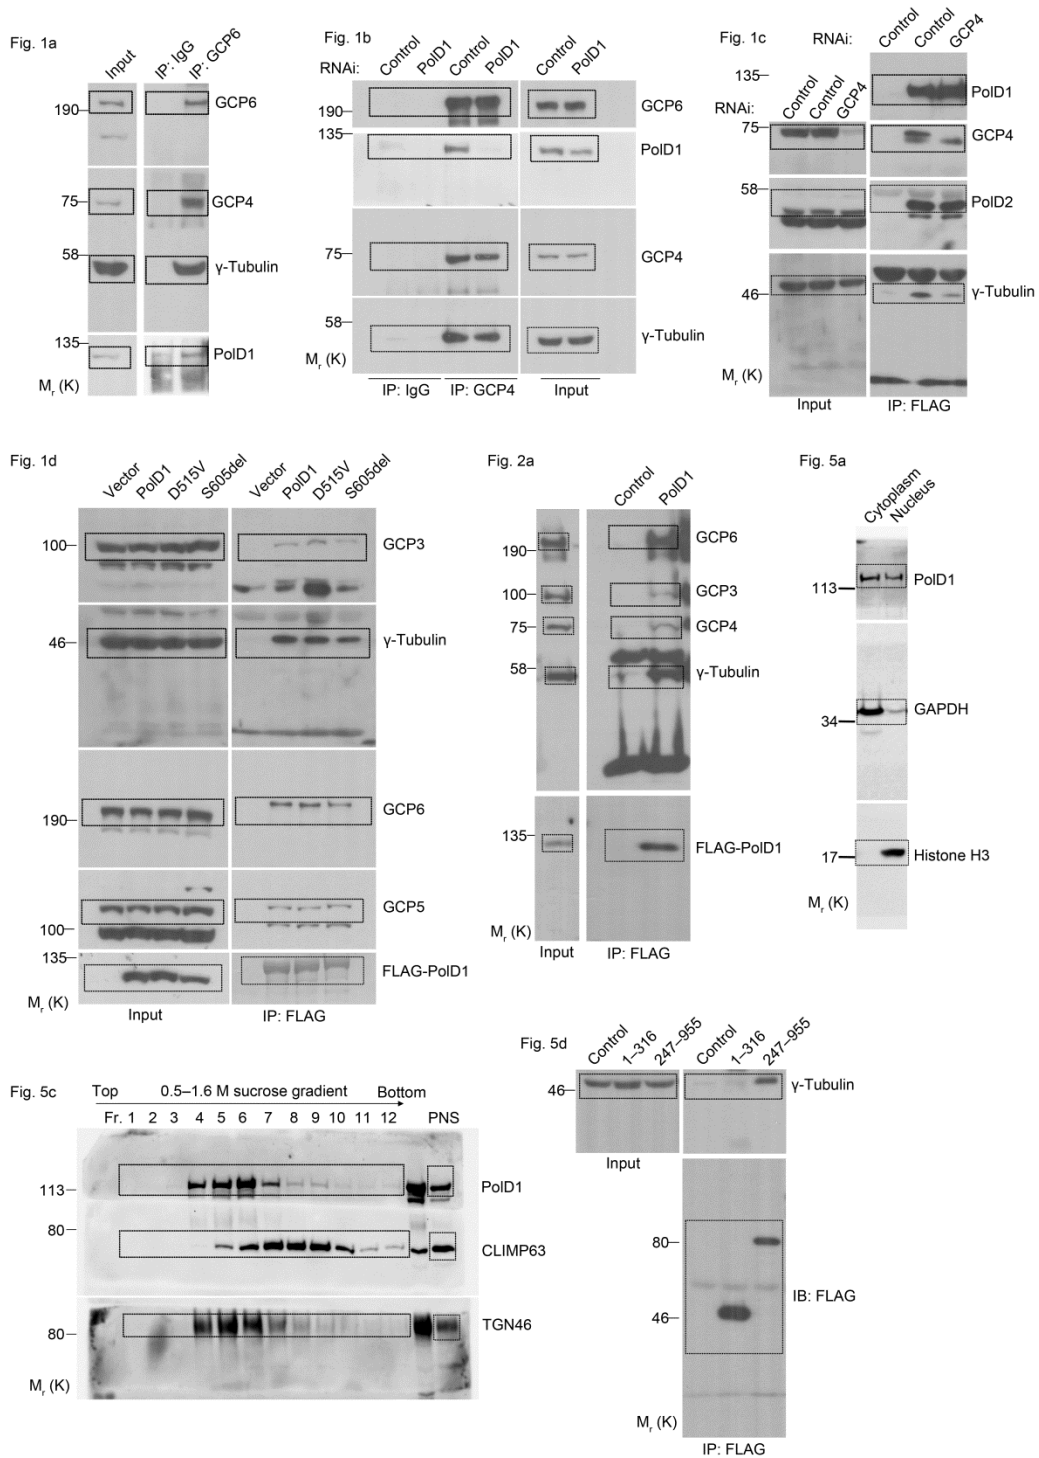

**Supplementary Figure 8** Uncropped Western Blot images.

PoID1 peptides identified by mass spectrometry

| No. | Expectation value    | Peptide             |
|-----|----------------------|---------------------|
| 1   | $1.2 \times 10^{-2}$ | AEAVLLR             |
| 2   | $8.5 \times 10^{-3}$ | VVSQLLR             |
| 3   | $9.3 \times 10^{-3}$ | LLEQGIR             |
| 4   | $3.9 \times 10^{-4}$ | VGLLAFAK            |
| 5   | $7.0 \times 10^{-3}$ | ELNLAISR            |
| 6   | $3.6 \times 10^{-2}$ | TPTGDEFVK           |
| 7   | $3.9 \times 10^{-3}$ | QAHVELAER           |
| 8   | $3.3 \times 10^{-4}$ | IDISQLVITK          |
| 9   | $4.3 \times 10^{-3}$ | IFEPILGEGR          |
| 10  | $7.4 \times 10^{-4}$ | LGLTEDQFIR          |
| 11  | $9.9 \times 10^{-4}$ | DLEDQEQLLR          |
| 12  | $5.5 \times 10^{-3}$ | VTGVPLSYLLSR        |
| 13  | $5.5 \times 10^{-4}$ | LMVLVNAVEMAR        |
| 14  | $1.4 \times 10^{-3}$ | VQMDMLQVLLR         |
| 15  | $8.4 \times 10^{-7}$ | FGVSSVAEAMALGR      |
| 16  | $3.3 \times 10^{-2}$ | QAMHEGLLMPVVK       |
| 17  | $1.2 \times 10^{-3}$ | VSANAVYGFTGAQVGK    |
| 18  | $1.4 \times 10^{-4}$ | EAADWVSGHFPSPIR     |
| 19  | $1.0 \times 10^{-6}$ | SEGGEDYTGATVIEPLK   |
| 20  | $9.5 \times 10^{-6}$ | SYTLNAVSFHFLGEQK    |
| 21  | $2.6 \times 10^{-2}$ | VQTFPFLGR           |
| 22  | $3.7 \times 10^{-3}$ | VYFPYLLISK          |
| 23  | $4.4 \times 10^{-2}$ | EVSHLNALEER         |
| 24  | $2.6 \times 10^{-6}$ | DLEDQEQLLR          |
| 25  | $8.2 \times 10^{-5}$ | VSANSVYGFTGAQVGK    |
| 26  | $3.1 \times 10^{-2}$ | EDVQHSIITDLQNGNDQTR |

**Supplementary Table 1** PolD1 peptides identified using mass spectrometry. The expected values were calculated by using MASCOT software with a cut-off value of  $5.0 \times 10^{-2}$ . The sequence coverage of PolD1 was 26.8%. The results shown are representative of 3 isolation experiments.

### Source data for Figure 2b

| Microtubule numbers (%) | 0 nM PolD1 | 56 nM PolD1 | 111 nM PolD1 | 222 nM PolD1 | 267 nM PolD1 | 356 nM PolD1 |
|-------------------------|------------|-------------|--------------|--------------|--------------|--------------|
| Average                 | 100        | 79.72       | 41.94        | 16.13        | 13.96        | 9.6          |
| s.d.                    | 0          | 16.41       | 11.17        | 1.64         | 1.93         | 2.31         |
| s.e.m.                  | 0          | 5.19        | 3.53         | 0.52         | 0.61         | 0.73         |

### Supplementary Table 2 Source data for Figure 2b.

### Source data for Figure 2c

| Microtubule numbers (%) | Buffer | $\gamma$ TuRC | $\gamma$ TuRC+ PolD1 | $\gamma$ TuRC+ D515V | $\gamma$ TuRC+ S605del | $\gamma$ TuRC+ PolD2 |
|-------------------------|--------|---------------|----------------------|----------------------|------------------------|----------------------|
| Average                 | 0.76   | 100           | 15.3                 | 6.27                 | 3.47                   | 98.18                |
| s.d.                    | 0.52   | 0             | 7.21                 | 2.26                 | 1.99                   | 1.08                 |

### Supplementary Table 3 Source data for Figure 2c.

### Source data for Figure 3c

| Microtubule numbers normalized by Golgi mass | GFP  | PolD1   | D515V   | S605del |
|----------------------------------------------|------|---------|---------|---------|
| Exp#1                                        | 3.8  | 0.92    | 0.85    | 0.74    |
| Exp#2                                        | 4.66 | 0.64    | 0.76    | 0.89    |
| Exp#3                                        | 4.83 | 0.59    | 0.58    | 0.64    |
| Average                                      | 4.43 | 0.72    | 0.73    | 0.76    |
| s.d.                                         | 0.55 | 0.18    | 0.14    | 0.13    |
| P-value                                      |      | 0.00038 | 0.00036 | 0.00036 |

### Supplementary Table 4 Source data for Figure 3c.

### Source data for Figure 4

| Microtubule numbers normalized by Golgi mass | Control | PolD1 RNAi |
|----------------------------------------------|---------|------------|
| Exp#1                                        | 2.94    | 18.22      |
| Exp#2                                        | 2.18    | 15.56      |
| Exp#3                                        | 4.60    | 21.32      |
| Average                                      | 3.24    | 18.37      |
| s.d.                                         | 1.24    | 2.89       |
| P-value                                      |         | 0.00089    |

### Supplementary Table 5 Source data for Figure 4.

### Source data for Figure 5e

| Microtubule numbers normalized by Golgi mass | GFP  | 247-955 |
|----------------------------------------------|------|---------|
| Exp#1                                        | 5.50 | 0.35    |
| Exp#2                                        | 3.50 | 0.54    |
| Exp#3                                        | 4.67 | 0.33    |
| Average                                      | 4.56 | 0.41    |
| s.d.                                         | 1.00 | 0.15    |
| P-value                                      |      | 0.0021  |

### Supplementary Table 6 Source data for Figure 5e.

### Source data for Figure 6a (Golgi area)

| Golgi area (%) | Control | PolD1 RNAi |
|----------------|---------|------------|
| Exp#1          | 100     | 159.09     |
| Exp#2          | 100     | 132.28     |
| Exp#3          | 100     | 168.20     |
| Average        | 100     | 152.48     |
| s.d.           | 0       | 18.67      |
| P-value        |         | 0.0387     |

### Supplementary Table 7 Source data for Figure 6a (Golgi area).

### Source data for Figure 6a (Golgi compactness)

| Golgi compactness (%) | Control | PolD1 RNAi |
|-----------------------|---------|------------|
| Exp#1                 | 70.95   | 52.86      |
| Exp#2                 | 68.5    | 54.22      |
| Exp#3                 | 70.91   | 57.47      |
| Average               | 70.12   | 54.85      |
| s.d.                  | 1.4     | 2.37       |
| P-value               |         | 0.0017     |

### Supplementary Table 8 Source data for Figure 6a (Golgi compactness).

### Source data for Figure 6a (Microtubule intensity)

| Microtubule intensity (%) | Control | PolD1 RNAi |
|---------------------------|---------|------------|
| Exp#1                     | 100     | 166.47     |
| Exp#2                     | 100     | 155.35     |
| Exp#3                     | 100     | 147.92     |
| Average                   | 100     | 156.58     |
| s.d.                      | 0       | 9.33       |
| P-value                   |         | 0.0089     |

### Supplementary Table 9 Source data for Figure 6a (Microtubule intensity).



Source data for Figure 6c (Average size of dispersed Golgi particles)

| Control                                       |       |        |        |        |        |
|-----------------------------------------------|-------|--------|--------|--------|--------|
| Average size of dispersed Golgi particles (%) | 0 min | 7 min  | 15 min | 22 min | 30 min |
| Exp#1                                         | 100   | 143.87 | 183.87 | 176.85 | 129.63 |
| Exp#2                                         | 100   | 132.28 | 186.97 | 161.69 | 135.35 |
| Exp#3                                         | 100   | 122.43 | 170.00 | 139.37 | 161.73 |
| Average                                       | 100   | 132.86 | 180.28 | 159.31 | 142.24 |
| s.e.m.                                        | 0     | 6.20   | 5.22   | 10.89  | 9.89   |
| PolD1 RNAi                                    |       |        |        |        |        |
| Average size of dispersed Golgi particles (%) | 0 min | 7 min  | 15 min | 22 min | 30 min |
| Exp#1                                         | 100   | 126.98 | 160.85 | 162.14 | 151.58 |
| Exp#2                                         | 100   | 135.99 | 192.48 | 167.29 | 156.01 |
| Exp#3                                         | 100   | 130.71 | 155.59 | 148.76 | 145.13 |
| Average                                       | 100   | 131.23 | 169.64 | 159.40 | 150.91 |
| s.e.m.                                        | 0     | 2.62   | 11.52  | 5.52   | 3.16   |

**Supplementary Table 10** Source data for Figure 6c (Average size of dispersed Golgi particles).

Source data for Figure 6c (Total area of dispersed Golgi particles)

| Control                                     |       |        |        |        |
|---------------------------------------------|-------|--------|--------|--------|
| Total area of dispersed Golgi particles (%) | 0 min | 15 min | 30 min | 60 min |
| Exp#1                                       | 100   | 52.83  | 19.25  | 2.14   |
| Exp#2                                       | 100   | 44.27  | 16.90  | 6.22   |
| Exp#3                                       | 100   | 56.31  | 9.16   | 5.05   |
| Average                                     | 100   | 51.14  | 15.10  | 4.47   |
| s.e.m.                                      | 0     | 3.58   | 3.05   | 1.21   |
| PolD1 RNAi                                  |       |        |        |        |
| Total area of dispersed Golgi particles (%) | 0 min | 15 min | 30 min | 60 min |
| Exp#1                                       | 100   | 53.74  | 32.18  | 23.64  |
| Exp#2                                       | 100   | 76.02  | 40.66  | 26.50  |
| Exp#3                                       | 100   | 57.49  | 44.65  | 25.89  |
| Average                                     | 100   | 62.42  | 39.16  | 25.34  |
| s.e.m.                                      | 0     | 6.88   | 3.68   | 0.087  |

**Supplementary Table 11** Source data for Figure 6c (Total area of dispersed Golgi particles).

Source data for Figure 7a

| Reoriented Golgi (% cells) | 0 h   | 3 h   | 5 h   | 8 h   |
|----------------------------|-------|-------|-------|-------|
| Control                    | 24.07 | 46.24 | 70.06 | 84.21 |
| s.e.m.                     | 1.05  | 1.59  | 1.67  | 1.76  |
| PolD1 RNAi                 | 25.37 | 31.28 | 44.64 | 52.49 |
| s.e.m.                     | 3.20  | 1.09  | 1.43  | 2.38  |

**Supplementary Table 12** Source data for Figure 7a.

Source data for Figure 7c

| Scratch area (%) |       |       |       |         |      |        |
|------------------|-------|-------|-------|---------|------|--------|
| Control          | Exp#1 | Exp#2 | Exp#3 | Average | s.d. | s.e.m. |
| 0 min            | 100   | 100   | 100   | 100     | 0    | 0      |
| 50 min           | 97.81 | 96.86 | 97.13 | 97.27   | 0.49 | 0.28   |
| 100 min          | 95.86 | 95.29 | 94.50 | 95.22   | 0.69 | 0.40   |
| 150 min          | 94.40 | 91.48 | 92.34 | 92.74   | 1.5  | 0.87   |
| 200 min          | 92.21 | 89.69 | 88.28 | 90.06   | 1.99 | 1.15   |
| 250 min          | 89.78 | 87.89 | 83.49 | 87.06   | 3.23 | 1.86   |
| 300 min          | 86.13 | 85.65 | 82.30 | 84.69   | 2.09 | 1.21   |
| 350 min          | 81.51 | 81.84 | 76.56 | 79.97   | 2.96 | 1.71   |
| 400 min          | 76.40 | 76.46 | 72.73 | 75.19   | 2.14 | 1.23   |
| 450 min          | 73.24 | 73.32 | 70.10 | 72.22   | 1.84 | 1.06   |
| 500 min          | 67.64 | 66.59 | 61.96 | 65.40   | 3.02 | 1.74   |
| 550 min          | 65.69 | 58.52 | 57.90 | 60.70   | 4.33 | 2.50   |
| 600 min          | 55.72 | 55.61 | 53.59 | 54.97   | 1.20 | 0.69   |
| 650 min          | 51.58 | 47.76 | 48.33 | 49.22   | 2.06 | 1.19   |
| 700 min          | 47.20 | 43.95 | 41.39 | 44.18   | 2.91 | 1.68   |
| 750 min          | 41.36 | 40.13 | 39.47 | 40.32   | 0.96 | 0.55   |
| 800 min          | 36.25 | 35.65 | 34.69 | 35.53   | 0.79 | 0.46   |
| 850 min          | 35.28 | 30.04 | 28.23 | 31.18   | 3.66 | 2.11   |
| 900 min          | 28.71 | 24.44 | 23.68 | 25.61   | 2.71 | 1.56   |
| 950 min          | 25.79 | 19.28 | 18.18 | 21.09   | 4.11 | 2.37   |
| 1000 min         | 24.09 | 13.45 | 11.00 | 16.18   | 6.96 | 4.02   |
| 1050 min         | 19.71 | 8.52  | 6.22  | 11.48   | 7.22 | 4.17   |
| 1100 min         | 7.54  | 4.93  | 0     | 4.16    | 3.83 | 2.21   |
| 1150 min         | 0     | 0     | 0     | 0       | 0    | 0      |
| 1185 min         | 0     | 0     | 0     | 0       | 0    | 0      |
| Scratch area (%) |       |       |       |         |      |        |
| PolD1 RNAi       | Exp#1 | Exp#2 | Exp#3 | Average | s.d. | s.e.m. |
| 0 min            | 100   | 100   | 100   | 100     | 0    | 0      |
| 50 min           | 98.25 | 97.74 | 97.67 | 97.89   | 0.32 | 0.18   |
| 100 min          | 93.77 | 96.61 | 95.60 | 95.33   | 1.44 | 0.83   |
| 150 min          | 91.27 | 94.36 | 93.26 | 92.96   | 1.56 | 0.90   |
| 200 min          | 88.78 | 92.78 | 90.93 | 90.83   | 2.00 | 1.16   |
| 250 min          | 85.04 | 90.29 | 89.64 | 88.32   | 2.86 | 1.65   |
| 300 min          | 83.04 | 85.78 | 89.12 | 85.98   | 3.04 | 1.76   |
| 350 min          | 82.54 | 81.72 | 87.56 | 83.94   | 3.17 | 1.83   |
| 400 min          | 77.06 | 76.52 | 83.42 | 79.00   | 3.84 | 2.22   |
| 450 min          | 73.32 | 72.69 | 80.57 | 75.52   | 4.38 | 2.53   |
| 500 min          | 67.08 | 71.11 | 77.20 | 71.80   | 5.10 | 2.94   |
| 550 min          | 64.09 | 65.91 | 75.65 | 68.55   | 6.21 | 3.59   |
| 600 min          | 61.60 | 64.79 | 73.58 | 66.65   | 6.20 | 3.58   |
| 650 min          | 58.10 | 61.63 | 70.21 | 63.31   | 6.23 | 3.59   |
| 700 min          | 54.61 | 59.59 | 64.25 | 59.49   | 4.82 | 2.78   |
| 750 min          | 50.62 | 57.79 | 62.69 | 57.04   | 6.07 | 3.50   |
| 800 min          | 46.13 | 55.08 | 60.10 | 53.77   | 7.08 | 4.09   |
| 850 min          | 44.64 | 51.69 | 54.66 | 50.33   | 5.15 | 2.97   |
| 900 min          | 40.65 | 48.76 | 44.56 | 44.66   | 4.06 | 2.34   |
| 950 min          | 37.66 | 46.50 | 41.19 | 41.78   | 4.45 | 2.57   |
| 1000 min         | 34.16 | 41.53 | 33.42 | 36.37   | 4.49 | 2.59   |
| 1050 min         | 30.17 | 36.57 | 27.72 | 31.49   | 4.57 | 2.64   |
| 1100 min         | 24.94 | 33.41 | 23.06 | 27.13   | 5.51 | 3.18   |
| 1150 min         | 22.44 | 28.22 | 21.24 | 23.97   | 3.73 | 2.15   |
| 1185 min         | 20.45 | 25.96 | 19.95 | 22.12   | 3.34 | 1.93   |

Supplementary Table 13 Source data for Figure 7c.

Source data for Supplementary Figure 3b

| Fluorescence intensity | CDK5RAP2 | $\gamma$ -Tubulin | PoID1 RNAi | CDK5RAP2 | $\gamma$ -Tubulin |
|------------------------|----------|-------------------|------------|----------|-------------------|
| Control                | 15397.92 | 5641.19           |            | 29865.60 | 6455.75           |
|                        | 25500.05 | 6386.57           |            | 18146.35 | 5284.75           |
|                        | 24528.86 | 4851.38           |            | 15140.48 | 3685.75           |
|                        | 9135.61  | 3830.20           |            | 15619.12 | 4293.30           |
|                        | 19956.90 | 3708.27           |            | 23627.30 | 4063.15           |
|                        | 15844.01 | 5382.11           |            | 23987.22 | 5090.35           |
|                        | 11127.27 | 2926.14           |            | 14162.32 | 3986.69           |
|                        | 8079.59  | 2522.30           |            | 9399.89  | 1996.79           |
|                        | 14274.86 | 3573.96           |            | 12331.27 | 2834.87           |
|                        | 15805.22 | 4301.15           |            | 26555.61 | 6692.04           |
|                        | 10713.21 | 4023.67           |            | 17373.28 | 5888.37           |
|                        | 12659.07 | 5171.24           |            | 18301.46 | 5160.69           |
|                        | 17027.33 | 5446.39           |            | 23774.10 | 6581.43           |
|                        | 18457.69 | 5898.58           |            | 14982.12 | 4862.45           |
|                        | 13180.98 | 3866.29           |            | 13932.20 | 4220.90           |
|                        | 13763.31 | 3532.35           |            | 6918.91  | 1987.48           |
|                        | 12174.30 | 3704.60           |            | 10468.91 | 3294.48           |
|                        | 12101.72 | 3098.28           |            | 12476.66 | 3742.81           |
|                        | 18617.68 | 5244.38           |            | 16218.30 | 4759.63           |
|                        | 9118.88  | 2814.68           |            | 12063.02 | 4185.21           |
|                        | 10542.85 | 3414.47           |            | 14213.36 | 5418.44           |
|                        | 16327.93 | 4468.26           |            | 11388.36 | 3640.30           |
|                        | 27386.17 | 5360.82           |            | 8710.80  | 3205.89           |
|                        | 15931.41 | 4251.44           |            | 14320.59 | 3583.20           |
|                        | 21364.58 | 5869.31           |            | 12849.97 | 3764.40           |
|                        | 19014.89 | 4233.27           |            | 13712.85 | 4325.86           |
|                        | 19963.06 | 4170.08           |            | 17778.24 | 3116.56           |
|                        | 14366.29 | 2871.46           |            | 16281.22 | 3875.18           |
|                        | 21286.50 | 4791.56           |            | 22400.05 | 6048.56           |
|                        | 24130.88 | 4802.57           |            | 23938.44 | 3709.45           |
|                        | 17617.95 | 4520.73           |            | 21639.05 | 5839.43           |
|                        | 19835.59 | 5555.35           |            | 20221.21 | 4060.36           |
|                        | 21707.64 | 6764.36           |            | 16737.82 | 5551.06           |
|                        | 15464.57 | 4626.75           |            | 16383.78 | 4004.83           |
|                        | 18963.48 | 4847.63           |            | 16105.51 | 4807.74           |
|                        | 18923.50 | 4169.62           |            | 15926.83 | 5102.44           |
|                        | 9680.16  | 2153.91           |            | 16128.97 | 4371.84           |
|                        | 12549.61 | 3330.04           |            | 12314.19 | 3559.97           |
|                        | 13807.17 | 3889.36           |            | 21305.59 | 4046.55           |
|                        | 7479.62  | 3172.33           |            | 23551.29 | 3643.04           |
|                        | 21575.90 | 4523.88           |            | 19275.98 | 3456.95           |
|                        | 12167.58 | 3114.62           |            | 9861.74  | 2770.92           |
|                        | 24907.41 | 5137.36           |            | 20674.39 | 4775.78           |
|                        | 26164.81 | 6121.70           |            | 10441.27 | 3715.06           |
|                        | 26750.50 | 5291.43           |            | 20524.36 | 3271.28           |
|                        | 16576.15 | 4945.06           |            | 15339.13 | 4497.88           |
|                        | 25509.84 | 5117.88           |            | 23457.76 | 5577.35           |
|                        | 19387.79 | 2735.78           |            | 14417.82 | 3627.01           |
|                        | 16349.12 | 3820.26           |            | 20112.38 | 5083.56           |
|                        | 16719.98 | 4010.03           |            | 15645.10 | 2970.47           |
| Average                | 16998.35 | 4360.10           |            | 16820.04 | 4289.77           |
| s.d.                   | 5273.19  | 1072.32           |            | 4991.78  | 1102.03           |
| P-value                |          |                   |            | 0.8625   | 0.7470            |

Supplementary Table 14 Source data for Supplementary Figure 3b.

Source data for Supplementary Figure 3c

| Microtubule numbers normalized by Golgi mass | PoD1 RNAi | PoD1&AKAP450 RNAi     |
|----------------------------------------------|-----------|-----------------------|
| Exp#1                                        | 15.75     | 0.50                  |
| Exp#2                                        | 16.83     | 0.89                  |
| Exp#3                                        | 16.25     | 0.88                  |
| Average                                      | 16.28     | 0.75                  |
| s.d.                                         | 0.54      | 0.22                  |
| P-value                                      |           | $1.34 \times 10^{-6}$ |

**Supplementary Table 15** Source data for Supplementary Figure 3c.

Source data for Supplementary Figure 7

| Migration persistence       | Control | PoD1 RNAi |
|-----------------------------|---------|-----------|
| 90%                         | 0.65    | 0.60      |
| 75%                         | 0.35    | 0.39      |
| Median                      | 0.22    | 0.18      |
| 25%                         | 0.09    | 0.12      |
| 10%                         | 0.06    | 0.06      |
| Mean                        | 0.27    | 0.29      |
|                             |         |           |
| Migration distance (pixels) | Control | PoD1 RNAi |
| 90%                         | 109.05  | 137.41    |
| 75%                         | 96.51   | 105.70    |
| Median                      | 82.14   | 76.74     |
| 25%                         | 69.33   | 52.16     |
| 10%                         | 60.39   | 47.70     |
| Mean                        | 86.73   | 83.67     |

**Supplementary Table 16** Source data for Supplementary Figure 7.
